# Supplementary material for: Fungal microbiota dysbiosis in IBD
Source: HighWire-hosted journal article supplement (doi:10.1136/gutjnl-2015-310746), 2016-02-03
Supplement: gutjnl-2015-310746supp_tables.pdf [file gutjnl-2015-310746supp_tables.pdf]

**Table S1: Study population**

|                                | <b>IBD (n=235)</b>        |              | <b>HS (n=38)</b> |
|--------------------------------|---------------------------|--------------|------------------|
| Age: Year (mean +/- SD)        | 40.4 +/- 14.6             |              | 35.8 +/- 13.2    |
| Male: n (%)                    | 94 (40.0%)                |              | 17 (44.7%)       |
| Active smoking: n (%)          | 55 (23.4%)                |              | 3 (7.9%)         |
| Flare / remission              | 106 (45.1%) / 129 (54.9%) |              | NA               |
| CD/UC                          | CD                        | UC           | NA               |
| n (%)                          | 149 (63.4%)               | 86 (36.6%)   | NA               |
| <b>Montreal classification</b> |                           |              |                  |
| A1 / A2 / A3 (n)               | 30 / 95 / 24              | NA           | NA               |
| L1 / L2 / L3 (n)               | 35 / 42 / 72              | NA           | NA               |
| B1 / B2 / B3 (n)               | 58 / 24 / 72              | NA           | NA               |
| E1 / E2 / E3 (n)               | NA                        | 12 / 49 / 25 | NA               |
| <b>Treatment: n (%)</b>        |                           |              |                  |
| 5-ASA                          | 84 (35.7%)                |              | 0                |
| Corticosteroids                | 45 (19.1%)                |              | 0                |
| Thiopurine or Methotrexate     | 88 (37.4%)                |              | 0                |
| anti-TNF alpha                 | 109 (46.4%)               |              | 0                |
| Antibiotics                    | 0                         |              | 0                |

**Supplementary Table 2: Genotype of patients with IBD**

|                            | <b>G0</b> | <b>G1</b> | <b>G2</b> | <b>FrqG0</b> | <b>FrqG1</b> | <b>FrqG2</b> | <b>N</b> | <b>MAF</b> |
|----------------------------|-----------|-----------|-----------|--------------|--------------|--------------|----------|------------|
| <i>CARD9_rs10781499</i>    | A:A       | A:G       | G:G       | 31           | 93           | 54           | 178      | 0.44       |
| <i>CARD9_rs11145835</i>    | A:A       | A:G       | G:G       | 135          | 41           | 2            | 178      | 0.13       |
| <i>DC.SIGN_rs2287886</i>   | A:A       | A:G       | G:G       | 34           | 68           | 74           | 176      | 0.39       |
| <i>DC.SIGN_rs4804803</i>   | A:A       | A:G       | G:G       | 117          | 55           | 6            | 178      | 0.19       |
| <i>DC.SIGN_rs7248637</i>   | A:A       | A:G       | G:G       | 26           | 42           | 113          | 181      | 0.26       |
| <i>DC.SIGN_rs7252229</i>   | C:C       | C:G       | G:G       | 25           | 45           | 109          | 179      | 0.27       |
| <i>Dectin.1_rs16910526</i> | G:G       | G:T       | T:T       | 2            | 15           | 163          | 180      | 0.05       |
| <i>Dectin.1_rs16910631</i> | C:C       | C:T       | T:T       | 154          | 25           | 0            | 179      | 0.07       |
| <i>Dectin.1_rs2078178</i>  | C:C       | C:T       | T:T       | 102          | 58           | 15           | 175      | 0.25       |
| <i>Dectin.1_rs3901533</i>  | G:G       | G:T       | T:T       | 108          | 65           | 7            | 180      | 0.22       |
| <i>Dectin.1_rs7309123</i>  | C:C       | C:G       | G:G       | 58           | 86           | 36           | 180      | 0.44       |
| <i>Dectin.2_rs4264222</i>  | C:C       | C:T       | T:T       | 103          | 64           | 12           | 179      | 0.25       |
| <i>Dectin.2_rs4459385</i>  | C:C       | C:T       | T:T       | 96           | 58           | 23           | 177      | 0.29       |
| <i>Dectin.2_rs7134303</i>  | A:A       | A:G       | G:G       | 115          | 53           | 12           | 180      | 0.21       |
| <i>Mincle_rs10841845</i>   | A:A       | A:G       | G:G       | 100          | 59           | 20           | 179      | 0.28       |
| <i>TLR1_rs4833095</i>      | C:C       | C:T       | T:T       | 26           | 80           | 69           | 175      | 0.38       |
| <i>TLR1_rs5743611</i>      | C:C       | C:G       | G:G       | 0            | 18           | 160          | 178      | 0.05       |
| <i>TLR1_rs5743618</i>      | G:G       | G:T       | T:T       | 56           | 75           | 47           | 178      | 0.47       |
| <i>TLR2_rs5743708</i>      | A:A       | A:G       | G:G       | 0            | 9            | 168          | 177      | 0.03       |
| <i>TLR3_rs3775291</i>      | A:A       | A:G       | G:G       | 16           | 61           | 99           | 176      | 0.26       |
| <i>TLR4_rs4986790</i>      | A:A       | A:G       | G:G       | 158          | 20           | 0            | 178      | 0.056      |
| <i>TLR4_rs4986791</i>      | C:C       | C:T       | T:T       | 161          | 18           | 0            | 179      | 0.05       |

MAF, minor allele frequency

Variable  
1 5asaoral  
2 age  
3 antitnf  
4 antitnf  
5 antitnf  
6 antitnf  
7 corticoide  
8 corticoide  
9 corticoide  
10 F\_R  
11 F\_R  
12 F\_R  
13 F\_R  
14 F\_R  
15 F\_R  
16 F\_R  
17 F\_R  
18 F\_R  
19 F\_R  
20 F\_R  
21 F\_R  
22 F\_R  
23 F\_R  
24 F\_R  
25 F\_R  
26 F\_R  
27 F\_R  
28 F\_R  
29 F\_R  
30 F\_R  
31 F\_R  
32 F\_R  
33 F\_R  
34 F\_R  
35 F\_R  
36 F\_R  
37 F\_R  
38 F\_R  
39 F\_R  
40 F\_R  
41 F\_R  
42 F\_R  
43 F\_R  
44 F\_R  
45 F\_R

46 F\_R  
47 F\_R  
48 F\_R  
49 F\_R  
50 F\_R  
51 F\_R  
52 F\_R  
53 F\_R  
54 F\_R  
55 F\_R  
56 F\_R  
57 F\_R  
58 F\_R  
59 F\_R  
60 F\_R  
61 F\_R  
62 F\_R  
63 F\_R  
64 F\_R  
65 F\_R  
66 F\_R  
67 F\_R  
68 F\_R  
69 F\_R  
70 F\_R  
71 F\_R  
72 F\_R  
73 F\_R  
74 F\_R  
75 F\_R  
76 F\_R  
77 F\_R  
78 F\_R  
79 F\_R  
80 F\_R  
81 F\_R  
82 F\_R  
83 F\_R  
84 F\_R  
85 F\_R  
86 F\_R  
87 F\_R  
88 F\_R  
89 IBD\_HS  
90 IBD\_HS  
91 IBD\_HS

92 IBD\_HS  
93 IBD\_HS  
94 IBD\_HS  
95 IBD\_HS  
96 IBD\_HS  
97 IBD\_HS  
98 IBD\_HS  
99 IBD\_HS  
100 IBD\_HS  
101 IBD\_HS  
102 IBD\_HS  
103 IBD\_HS  
104 IBD\_HS  
105 IBD\_HS  
106 IBD\_HS  
107 IBD\_HS  
108 IBD\_HS  
109 IBD\_HS  
110 IBD\_HS  
111 IBD\_HS  
112 IBD\_HS  
113 IBD\_HS  
114 IBD\_HS  
115 IBD\_HS  
116 IBD\_HS  
117 IBD\_HS  
118 IBD\_HS  
119 IBD\_HS  
120 IBD\_HS  
121 IBD\_HS  
122 IBD\_HS  
123 IBD\_HS  
124 IBD\_HS  
125 IBD\_HS  
126 IBD\_HS  
127 IBD\_HS  
128 IBD\_HS  
129 IBD\_HS  
130 IBD\_HS  
131 IBD\_HS  
132 IBD\_HS  
133 IBD\_HS  
134 IBD\_HS  
135 IBD\_HS  
136 IBD\_HS  
137 IBD\_HS

138 IBD\_HS  
139 IBD\_HS  
140 IBD\_HS  
141 IBD\_HS  
142 IBD\_HS  
143 IBD\_HS  
144 IBD\_HS  
145 IBD\_HS  
146 IBD\_HS  
147 IBD\_HS  
148 IBD\_HS  
149 Ileum  
150 Ileum  
151 Ileum  
152 Ileum  
153 Ileum  
154 Ileum  
155 Ileum  
156 Ileum  
157 Ileum  
158 Ileum  
159 Ileum  
160 Ileum  
161 Ileum  
162 Ileum  
163 Ileum  
164 Ileum  
165 Ileum  
166 Ileum  
167 Ileum  
168 Ileum  
169 Ileum  
170 Ileum  
171 Ileum  
172 Ileum  
173 Ileum  
174 Ileum  
175 Ileum  
176 Ileum  
177 THIOPURINE\_MTX  
178 THIOPURINE\_MTX

Feature

k\_Bacteria|p\_Bacteroidetes|c\_Bacteroidia|o\_Bacteroidales|f\_[Paraprevotellaceae]|g\_Para  
k\_Bacteria|p\_Actinobacteria|c\_Actinobacteria|o\_Bifidobacteriales|f\_Bifidobacteriaceae|g\_  
k\_Bacteria|p\_Firmicutes|c\_Bacilli|o\_Lactobacillales|f\_Enterococcaceae|g\_Enterococcus|s\_  
k\_Bacteria|p\_Firmicutes|c\_Clostridia|o\_Clostridiales|f\_Clostridiaceae|g\_  
k\_Bacteria|p\_Firmicutes|c\_Clostridia|o\_Clostridiales|f\_Clostridiaceae|g\_|s\_  
k\_Bacteria|p\_Firmicutes|c\_Clostridia|o\_Clostridiales|f\_Peptostreptococcaceae|g\_|s\_  
k\_Bacteria|p\_Bacteroidetes|c\_Bacteroidia|o\_Bacteroidales|f\_Porphyrimonadaceae|g\_Par  
k\_Bacteria|p\_Bacteroidetes|c\_Bacteroidia|o\_Bacteroidales|f\_Bacteroidaceae|g\_Bacteroid  
k\_Bacteria|p\_Bacteroidetes|c\_Bacteroidia|o\_Bacteroidales|f\_Porphyrimonadaceae|g\_Par  
k\_Bacteria|p\_Firmicutes|c\_Clostridia|o\_Clostridiales|f\_Lachnospiraceae|g\_Anaerostipes  
k\_Bacteria|p\_Firmicutes|c\_Clostridia|o\_Clostridiales|f\_Lachnospiraceae|g\_Anaerostipes|s\_  
k\_Bacteria|p\_Firmicutes|c\_Clostridia|o\_Clostridiales|f\_Lachnospiraceae|g\_Roseburia|Othe  
k\_Bacteria|p\_Firmicutes|c\_Clostridia|o\_Clostridiales|f\_Lachnospiraceae|g\_Roseburia|s\_f  
k\_Bacteria|p\_Firmicutes|c\_Clostridia|o\_Clostridiales|f\_Lachnospiraceae|g\_Roseburia  
k\_Bacteria|p\_Firmicutes|c\_Clostridia|o\_Clostridiales|f\_Lachnospiraceae|g\_Roseburia|s\_  
k\_Bacteria|p\_Firmicutes|c\_Clostridia|o\_Clostridiales|f\_Clostridiaceae|g\_Clostridium|s\_  
k\_Bacteria|p\_Firmicutes|c\_Clostridia|o\_Clostridiales|f\_Lachnospiraceae|g\_  
k\_Bacteria|p\_Firmicutes|c\_Clostridia|o\_Clostridiales|f\_Lachnospiraceae|g\_|s\_  
k\_Bacteria|p\_Firmicutes|c\_Clostridia|o\_Clostridiales|f\_Ruminococcaceae  
k\_Bacteria|p\_Firmicutes|c\_Clostridia|o\_Clostridiales  
k\_Bacteria|p\_Firmicutes|c\_Clostridia  
k\_Bacteria|p\_Firmicutes|c\_Clostridia|o\_Clostridiales|f\_Lachnospiraceae  
k\_Bacteria|p\_Firmicutes|c\_Clostridia|o\_Clostridiales|f\_Ruminococcaceae|g\_  
k\_Bacteria|p\_Firmicutes|c\_Clostridia|o\_Clostridiales|f\_Ruminococcaceae|g\_|s\_  
k\_Bacteria|p\_Firmicutes|c\_Clostridia|o\_Clostridiales|f\_Clostridiaceae|g\_Clostridium  
k\_Bacteria|p\_Firmicutes|c\_Clostridia|o\_Clostridiales|f\_Lachnospiraceae|g\_Coproccoccus  
k\_Bacteria|p\_Firmicutes|c\_Clostridia|o\_Clostridiales|f\_Lachnospiraceae|g\_Coproccoccus|s\_  
k\_Bacteria|p\_Firmicutes|c\_Clostridia|o\_Clostridiales|f\_Veillonellaceae|g\_Megamonas|s\_  
k\_Bacteria|p\_Firmicutes|c\_Clostridia|o\_Clostridiales|f\_Veillonellaceae|g\_Megamonas  
k\_Bacteria|p\_Firmicutes|c\_Clostridia|o\_Clostridiales|f\_Ruminococcaceae|g\_Ruminococcus  
k\_Bacteria|p\_Firmicutes|c\_Clostridia|o\_Clostridiales|f\_Ruminococcaceae|g\_Ruminococcus  
k\_Bacteria|p\_Firmicutes|c\_Clostridia|o\_Clostridiales|f\_Clostridiaceae  
k\_Bacteria|p\_Firmicutes|c\_Clostridia|o\_Clostridiales|f\_Lachnospiraceae|g\_Blautia|s\_  
k\_Bacteria|p\_Firmicutes|c\_Clostridia|o\_Clostridiales|f\_Lachnospiraceae|g\_Blautia  
k\_Bacteria|p\_Firmicutes|c\_Clostridia|o\_Clostridiales|f\_Christensenellaceae|g\_  
k\_Bacteria|p\_Firmicutes|c\_Clostridia|o\_Clostridiales|f\_Christensenellaceae|g\_|s\_  
k\_Bacteria|p\_Firmicutes|c\_Clostridia|o\_Clostridiales|f\_Lachnospiraceae|g\_Blautia|Other  
k\_Bacteria|p\_Firmicutes|c\_Clostridia|o\_Clostridiales|f\_Lachnospiraceae|g\_Lachnospira  
k\_Bacteria|p\_Firmicutes|c\_Clostridia|o\_Clostridiales|f\_Lachnospiraceae|g\_Lachnospira|s\_  
k\_Bacteria|p\_Actinobacteria|c\_Coriobacteriia|o\_Coriobacteriales|f\_Coriobacteriaceae|g\_|  
k\_Bacteria|p\_Actinobacteria|c\_Coriobacteriia|o\_Coriobacteriales|f\_Coriobacteriaceae|g\_  
k\_Bacteria|p\_Firmicutes  
k\_Bacteria|p\_Firmicutes|c\_Clostridia|o\_Clostridiales|f\_Ruminococcaceae|g\_Ruminococcus  
k\_Bacteria|p\_Firmicutes|c\_Clostridia|o\_Clostridiales|f\_Ruminococcaceae|Other  
k\_Bacteria|p\_Firmicutes|c\_Clostridia|o\_Clostridiales|f\_Ruminococcaceae|Other|Other

k\_Bacteria|p\_Firmicutes|c\_Clostridia|o\_Clostridiales|f\_Ruminococcaceae|g\_Faecalibacteri  
k\_Bacteria|p\_Firmicutes|c\_Clostridia|o\_Clostridiales|f\_\_  
k\_Bacteria|p\_Firmicutes|c\_Clostridia|o\_Clostridiales|f\_|g\_\_  
k\_Bacteria|p\_Firmicutes|c\_Clostridia|o\_Clostridiales|f\_|g\_|s\_\_  
k\_Bacteria|p\_Firmicutes|c\_Clostridia|o\_Clostridiales|f\_Ruminococcaceae|g\_Faecalibacteri  
k\_Bacteria|p\_Firmicutes|c\_Clostridia|o\_Clostridiales|f\_Christensenellaceae  
k\_Bacteria|p\_Firmicutes|c\_Clostridia|o\_Clostridiales|f\_Lachnospiraceae|g\_Dorea  
k\_Bacteria|p\_Firmicutes|c\_Bacilli|o\_Lactobacillales|f\_Lactobacillaceae|g\_Lactobacillus|s\_\_  
k\_Bacteria|p\_Firmicutes|c\_Clostridia|o\_Clostridiales|f\_Lachnospiraceae|g\_Dorea|s\_\_  
k\_Bacteria|p\_Proteobacteria|c\_Gammaproteobacteria|o\_Pasteurellales|f\_Pasteurellaceae|  
k\_Bacteria|p\_Firmicutes|c\_Clostridia|o\_Clostridiales|f\_Ruminococcaceae|g\_Ruminococcus  
k\_Bacteria|p\_Firmicutes|c\_Bacilli|o\_Lactobacillales|f\_Streptococcaceae|g\_Lactococcus  
k\_Bacteria|p\_Firmicutes|c\_Clostridia|o\_Clostridiales|f\_Peptostreptococcaceae|g\_\_  
k\_Bacteria|p\_Firmicutes|c\_Clostridia|o\_Clostridiales|f\_Lachnospiraceae|g\_Coproccoccus|s\_\_  
k\_Bacteria|p\_Actinobacteria|c\_Coriobacteriia  
k\_Bacteria|p\_Actinobacteria|c\_Coriobacteriia|o\_Coriobacteriales  
k\_Bacteria|p\_Actinobacteria|c\_Coriobacteriia|o\_Coriobacteriales|f\_Coriobacteriaceae  
k\_Bacteria|p\_Proteobacteria|c\_Gammaproteobacteria|o\_Pasteurellales|f\_Pasteurellaceae|  
k\_Bacteria|p\_Firmicutes|c\_Clostridia|o\_Clostridiales|f\_Clostridiaceae|g\_SMB53  
k\_Bacteria|p\_Firmicutes|c\_Clostridia|o\_Clostridiales|f\_Clostridiaceae|g\_SMB53|s\_\_  
k\_Bacteria|p\_Firmicutes|c\_Clostridia|o\_Clostridiales|f\_Lachnospiraceae|Other  
k\_Bacteria|p\_Firmicutes|c\_Clostridia|o\_Clostridiales|f\_Lachnospiraceae|Other|Other  
k\_Bacteria|p\_Firmicutes|c\_Clostridia|o\_Clostridiales|f\_Peptostreptococcaceae|g\_|s\_\_  
k\_Bacteria|p\_Firmicutes|c\_Erysipelotrichi|o\_Erysipelotrichales|f\_Erysipelotrichaceae|g\_Co  
k\_Bacteria|p\_Tenericutes|c\_Mollicutes|o\_RF39  
k\_Bacteria|p\_Tenericutes|c\_Mollicutes|o\_RF39|f\_|g\_\_  
k\_Bacteria|p\_Tenericutes|c\_Mollicutes|o\_RF39|f\_|g\_|s\_\_  
k\_Bacteria|p\_Tenericutes|c\_Mollicutes|o\_RF39|f\_\_  
k\_Bacteria|p\_Firmicutes|c\_Erysipelotrichi|o\_Erysipelotrichales|f\_Erysipelotrichaceae|g\_Co  
k\_Bacteria|p\_Proteobacteria|c\_Gammaproteobacteria|o\_Pasteurellales|f\_Pasteurellaceae|  
k\_Bacteria|p\_Firmicutes|c\_Erysipelotrichi|o\_Erysipelotrichales|f\_Erysipelotrichaceae|g\_Clo  
k\_Bacteria|p\_Firmicutes|c\_Erysipelotrichi|o\_Erysipelotrichales|f\_Erysipelotrichaceae|g\_Clo  
k\_Bacteria|p\_Proteobacteria|c\_Gammaproteobacteria|o\_Pasteurellales|f\_Pasteurellaceae|  
k\_Bacteria|p\_Bacteroidetes|c\_Bacteroidia|o\_Bacteroidales|f\_Bacteroidaceae|g\_Bacteroid  
k\_Bacteria|p\_Firmicutes|c\_Clostridia|o\_Clostridiales|f\_Lachnospiraceae|g\_Coproccoccus|O  
k\_Bacteria|p\_Firmicutes|c\_Clostridia|o\_Clostridiales|f\_Clostridiaceae|Other  
k\_Bacteria|p\_Firmicutes|c\_Clostridia|o\_Clostridiales|f\_Clostridiaceae|Other|Other  
k\_Bacteria|p\_Firmicutes|c\_Clostridia|o\_Clostridiales|Other  
k\_Bacteria|p\_Firmicutes|c\_Clostridia|o\_Clostridiales|Other|Other  
k\_Bacteria|p\_Firmicutes|c\_Clostridia|o\_Clostridiales|Other|Other|Other  
k\_Bacteria|p\_Proteobacteria  
k\_Bacteria|p\_Bacteroidetes|c\_Bacteroidia|o\_Bacteroidales|f\_Rikenellaceae|Other  
k\_Bacteria|p\_Bacteroidetes|c\_Bacteroidia|o\_Bacteroidales|f\_Rikenellaceae|Other|Other  
k\_Bacteria|p\_Proteobacteria|c\_Deltaproteobacteria|o\_Desulfovibrionales|f\_Desulfovibriona  
k\_Bacteria|p\_Firmicutes|c\_Clostridia|o\_Clostridiales|f\_\_  
k\_Bacteria|p\_Firmicutes|c\_Clostridia|o\_Clostridiales|f\_|g\_\_



k\_Bacteria|p\_Firmicutes|c\_Clostridia|o\_Clostridiales|f\_|g\_|s\_\_  
k\_Bacteria|p\_Proteobacteria|c\_Deltaproteobacteria|o\_Desulfovibrionales|f\_Desulfovibrion:  
k\_Bacteria|p\_Firmicutes|c\_Clostridia|o\_Clostridiales|f\_Lachnospiraceae|g\_Coproccoccus  
k\_Bacteria|p\_Firmicutes|c\_Clostridia|o\_Clostridiales|f\_Lachnospiraceae|g\_Anaerostipes  
k\_Bacteria|p\_Firmicutes|c\_Clostridia|o\_Clostridiales|f\_Lachnospiraceae|g\_Anaerostipes|s.  
k\_Bacteria|p\_Firmicutes|c\_Clostridia|o\_Clostridiales|f\_Ruminococcaceae|Other  
k\_Bacteria|p\_Firmicutes|c\_Clostridia|o\_Clostridiales|f\_Ruminococcaceae|Other|Other  
k\_Bacteria|p\_Firmicutes|c\_Clostridia|o\_Clostridiales|f\_Lachnospiraceae|g\_Coproccoccus|s\_  
k\_Bacteria|p\_Firmicutes|c\_Clostridia|o\_Clostridiales|f\_Christensenellaceae|g\_\_  
k\_Bacteria|p\_Firmicutes|c\_Clostridia|o\_Clostridiales|f\_Christensenellaceae|g\_|s\_\_  
k\_Bacteria|p\_Firmicutes|c\_Clostridia|o\_Clostridiales|f\_Christensenellaceae  
k\_Bacteria|p\_Firmicutes|c\_Clostridia|o\_Clostridiales|f\_Ruminococcaceae|g\_Ruminococcus  
k\_Bacteria|p\_Firmicutes|c\_Clostridia|o\_Clostridiales|f\_Ruminococcaceae|g\_Ruminococcus  
k\_Bacteria|p\_Firmicutes|c\_Clostridia|o\_Clostridiales  
k\_Bacteria|p\_Firmicutes|c\_Clostridia|o\_Clostridiales|f\_Ruminococcaceae|g\_\_  
k\_Bacteria|p\_Firmicutes|c\_Clostridia|o\_Clostridiales|f\_Ruminococcaceae|g\_|s\_\_  
k\_Bacteria|p\_Firmicutes|c\_Clostridia  
k\_Bacteria|p\_Firmicutes|c\_Clostridia|o\_Clostridiales|Other  
k\_Bacteria|p\_Firmicutes|c\_Clostridia|o\_Clostridiales|Other|Other  
k\_Bacteria|p\_Firmicutes|c\_Clostridia|o\_Clostridiales|Other|Other|Other  
k\_Bacteria|p\_Firmicutes|c\_Clostridia|o\_Clostridiales|f\_Ruminococcaceae|g\_Ruminococcus  
k\_Bacteria|p\_Firmicutes|c\_Clostridia|o\_Clostridiales|f\_[Mogibacteriaceae]|g\_\_  
k\_Bacteria|p\_Firmicutes|c\_Clostridia|o\_Clostridiales|f\_[Mogibacteriaceae]|g\_|s\_\_  
k\_Bacteria|p\_Firmicutes|c\_Clostridia|o\_Clostridiales|f\_Lachnospiraceae|g\_Coproccoccus|O  
k\_Bacteria|p\_Tenericutes|c\_Mollicutes|o\_RF39  
k\_Bacteria|p\_Tenericutes|c\_Mollicutes|o\_RF39|f\_|g\_\_  
k\_Bacteria|p\_Tenericutes|c\_Mollicutes|o\_RF39|f\_|g\_|s\_\_  
k\_Bacteria|p\_Tenericutes|c\_Mollicutes|o\_RF39|f\_\_  
k\_Bacteria|p\_Firmicutes|c\_Clostridia|o\_Clostridiales|f\_Dehalobacteriaceae  
k\_Bacteria|p\_Firmicutes|c\_Clostridia|o\_Clostridiales|f\_Ruminococcaceae  
k\_Bacteria|p\_Firmicutes|c\_Clostridia|o\_Clostridiales|f\_Lachnospiraceae|g\_Dorea|Other  
k\_Bacteria|p\_Firmicutes|c\_Clostridia|o\_Clostridiales|f\_Ruminococcaceae|g\_Ruminococcus  
k\_Bacteria|p\_Firmicutes|c\_Clostridia|o\_Clostridiales|f\_[Mogibacteriaceae]  
k\_Bacteria|p\_Tenericutes|c\_Mollicutes  
k\_Bacteria|p\_Bacteroidetes|c\_Bacteroidia|o\_Bacteroidales|f\_Rikenellaceae  
k\_Bacteria|p\_Bacteroidetes|c\_Bacteroidia|o\_Bacteroidales|f\_[Odoribacteraceae]|g\_Butyri  
k\_Bacteria|p\_Bacteroidetes|c\_Bacteroidia|o\_Bacteroidales|f\_[Odoribacteraceae]|g\_Butyri  
k\_Bacteria|p\_Tenericutes  
k\_Bacteria|p\_Firmicutes|c\_Clostridia|o\_Clostridiales|f\_Lachnospiraceae|g\_[Ruminococcus;  
k\_Bacteria|p\_Proteobacteria|c\_Deltaproteobacteria|o\_Desulfovibrionales  
k\_Bacteria|p\_Proteobacteria|c\_Deltaproteobacteria|o\_Desulfovibrionales|f\_Desulfovibrion:  
k\_Bacteria|p\_Proteobacteria|c\_Deltaproteobacteria  
k\_Bacteria|p\_Bacteroidetes|c\_Bacteroidia|o\_Bacteroidales|f\_Rikenellaceae|g\_\_  
k\_Bacteria|p\_Bacteroidetes|c\_Bacteroidia|o\_Bacteroidales|f\_Rikenellaceae|g\_|s\_\_  
k\_Bacteria|p\_Bacteroidetes|c\_Bacteroidia|o\_Bacteroidales|f\_Porphyrimonadaceae|g\_Par  
k\_Bacteria|p\_Firmicutes|c\_Clostridia|o\_Clostridiales|f\_Lachnospiraceae|g\_Dorea|s\_form

k\_Bacteria|p\_Firmicutes|c\_Clostridia|o\_Clostridiales|f\_Lachnospiraceae|g\_Blautia|Other  
k\_Bacteria|p\_Actinobacteria|c\_Coriobacteriia|o\_Coriobacteriales|f\_Coriobacteriaceae|g\_\_  
k\_Bacteria|p\_Firmicutes|c\_Erysipelotrichi|o\_Erysipelotrichales|f\_Erysipelotrichaceae|g\_\_[Ei  
k\_Bacteria|p\_Firmicutes|c\_Clostridia|o\_Clostridiales|f\_Lachnospiraceae|g\_Lachnobacteriu  
k\_Bacteria|p\_Firmicutes|c\_Clostridia|o\_Clostridiales|f\_Lachnospiraceae|g\_Lachnobacteriu  
k\_Bacteria|p\_Firmicutes|c\_Clostridia|o\_Clostridiales|f\_Clostridiaceae|g\_SMB53  
k\_Bacteria|p\_Firmicutes|c\_Clostridia|o\_Clostridiales|f\_Clostridiaceae|g\_SMB53|s\_\_  
k\_Bacteria|p\_Firmicutes|c\_Bacilli|o\_Lactobacillales|f\_Streptococcaceae|g\_Streptococcus|s  
k\_Bacteria|p\_Firmicutes|c\_Bacilli|o\_Gemellales|f\_Gemellaceae  
k\_Bacteria|p\_Firmicutes|c\_Erysipelotrichi|o\_Erysipelotrichales|f\_Erysipelotrichaceae|g\_\_[Ei  
k\_Bacteria|p\_Firmicutes|c\_Bacilli|o\_Gemellales|f\_Gemellaceae|g\_\_  
k\_Bacteria|p\_Firmicutes|c\_Clostridia|o\_Clostridiales|f\_Lachnospiraceae|g\_Roseburia|s\_f  
k\_Bacteria|p\_Firmicutes|c\_Clostridia|o\_Clostridiales|f\_Clostridiaceae|g\_SMB53  
k\_Bacteria|p\_Firmicutes|c\_Clostridia|o\_Clostridiales|f\_Clostridiaceae|g\_SMB53|s\_\_  
k\_Bacteria|p\_Firmicutes|c\_Clostridia|o\_Clostridiales|f\_Ruminococcaceae|g\_Ruminococcus  
k\_Bacteria|p\_Firmicutes|c\_Clostridia|o\_Clostridiales|f\_Ruminococcaceae|g\_Ruminococcus  
k\_Bacteria|p\_Firmicutes|c\_Clostridia|o\_Clostridiales|f\_Lachnospiraceae|g\_Roseburia|Othe  
k\_Bacteria|p\_Firmicutes|c\_Bacilli|o\_Turicibacterales  
k\_Bacteria|p\_Firmicutes|c\_Bacilli|o\_Turicibacterales|f\_Turicibacteraceae  
k\_Bacteria|p\_Firmicutes|c\_Bacilli|o\_Turicibacterales|f\_Turicibacteraceae|g\_Turicibacter  
k\_Bacteria|p\_Firmicutes|c\_Bacilli|o\_Turicibacterales|f\_Turicibacteraceae|g\_Turicibacter|s  
k\_Bacteria|p\_Firmicutes|c\_Clostridia|o\_Clostridiales|f\_[Tissierellaceae]|g\_Anaerococcus  
k\_Bacteria|p\_Firmicutes|c\_Clostridia|o\_Clostridiales|f\_[Tissierellaceae]|g\_Anaerococcus|s  
k\_Bacteria|p\_Firmicutes|c\_Clostridia|o\_Clostridiales|f\_Lachnospiraceae|g\_Anaerostipes  
k\_Bacteria|p\_Firmicutes|c\_Clostridia|o\_Clostridiales|f\_Lachnospiraceae|g\_Anaerostipes|s  
Unassigned|Other  
Unassigned|Other|Other  
Unassigned|Other|Other|Other|Other  
Unassigned|Other|Other|Other|Other|Other  
k\_Bacteria|p\_Firmicutes|c\_Clostridia|o\_Clostridiales|f\_Clostridiaceae|g\_\_  
k\_Bacteria|p\_Firmicutes|c\_Clostridia|o\_Clostridiales|f\_Clostridiaceae|g\_|s\_\_  
k\_Bacteria|p\_Firmicutes|c\_Clostridia|o\_Clostridiales|f\_Lachnospiraceae|g\_\_[Ruminococcus|  
k\_Bacteria|p\_Firmicutes|c\_Clostridia|o\_Clostridiales|f\_Lachnospiraceae|g\_Lachnospira  
k\_Bacteria|p\_Firmicutes|c\_Clostridia|o\_Clostridiales|f\_Lachnospiraceae|g\_Lachnospira|s\_\_  
k\_Bacteria|p\_Firmicutes|c\_Clostridia|o\_Clostridiales|f\_Lachnospiraceae|g\_Roseburia  
k\_Bacteria|p\_Firmicutes|c\_Clostridia|o\_Clostridiales|f\_Ruminococcaceae  
k\_Bacteria|p\_Firmicutes|c\_Clostridia|o\_Clostridiales|f\_[Tissierellaceae]|g\_Peptoniphilus  
k\_Bacteria|p\_Firmicutes|c\_Clostridia|o\_Clostridiales|f\_[Tissierellaceae]|g\_Peptoniphilus|s  
k\_Bacteria|p\_Firmicutes|c\_Clostridia|o\_Clostridiales|f\_Veillonellaceae|g\_Megamonas  
k\_Bacteria|p\_Firmicutes|c\_Clostridia|o\_Clostridiales|f\_Veillonellaceae|g\_Megamonas|s\_\_

| Value         | Coefficient           | N   | N.not.0 | P.value              |
|---------------|-----------------------|-----|---------|----------------------|
| `5asaoral`NA  | 0.00330928359366297   | 260 | 65      | 0.000735049653141003 |
| age           | -6.16973635172476e-05 | 260 | 68      | 0.000906658677367852 |
| antitnfyes    | -0.0118977218896839   | 260 | 254     | 0.000699035842138117 |
| antitnfyes    | 0.0104255533189508    | 260 | 259     | 0.00196524601948534  |
| antitnfyes    | 0.0104255533189508    | 260 | 259     | 0.00196524601948534  |
| antitnfyes    | 0.00740672523360804   | 260 | 222     | 0.00254860550503575  |
| corticoideyes | 0.0206417254618399    | 260 | 236     | 0.000155668124015778 |
| corticoideyes | 0.00547322875901667   | 260 | 173     | 0.00116162607554134  |
| corticoideyes | 0.00569309757436784   | 260 | 129     | 0.0024514906830929   |
| F_Rremission  | 0.0279416711382131    | 260 | 233     | 4.02031618913011e-13 |
| F_Rremission  | 0.0279416711382131    | 260 | 233     | 4.02031618913011e-13 |
| F_Rremission  | 0.0293950406333476    | 260 | 216     | 4.61389089758771e-10 |
| F_Rremission  | 0.0426550623077112    | 260 | 225     | 5.85483494810257e-10 |
| F_Rremission  | 0.0577294079689456    | 260 | 257     | 6.62481950448716e-09 |
| F_Rremission  | 0.0253481719608822    | 260 | 257     | 2.35193768828572e-08 |
| F_Rremission  | 0.0366244497569332    | 260 | 251     | 9.67770156634439e-08 |
| F_Rremission  | 0.0766713890940216    | 260 | 259     | 1.07836379677835e-07 |
| F_Rremission  | 0.0766713890940216    | 260 | 259     | 1.07836379677835e-07 |
| F_Rremission  | 0.0937495763546869    | 260 | 259     | 1.42562799330395e-07 |
| F_Rremission  | 0.182328343315544     | 260 | 260     | 1.79911997211372e-07 |
| F_Rremission  | 0.181576460797013     | 260 | 260     | 2.43288033396057e-07 |
| F_Rremission  | 0.155385601571415     | 260 | 259     | 3.7705923303716e-07  |
| F_Rremission  | 0.0638670789629989    | 260 | 259     | 6.55361379939375e-07 |
| F_Rremission  | 0.0638670789629989    | 260 | 259     | 6.55361379939375e-07 |
| F_Rremission  | 0.0340121804194754    | 260 | 252     | 8.91149713488754e-07 |
| F_Rremission  | 0.0545809550167818    | 260 | 259     | 1.66906721671177e-06 |
| F_Rremission  | 0.0530786318124208    | 260 | 259     | 2.53929636908439e-06 |
| F_Rremission  | 0.0046567771145008    | 260 | 120     | 2.64907590345008e-06 |
| F_Rremission  | 0.00448205868353029   | 260 | 121     | 5.11681307408498e-06 |
| F_Rremission  | 0.0607995731416748    | 260 | 257     | 5.53478505479781e-06 |
| F_Rremission  | 0.0601611144734055    | 260 | 257     | 6.00274171559339e-06 |
| F_Rremission  | 0.032323831571929     | 260 | 259     | 7.85054341434534e-06 |
| F_Rremission  | 0.0687047386389922    | 260 | 259     | 1.1375276773599e-05  |
| F_Rremission  | 0.0693365944527671    | 260 | 259     | 1.28943803673415e-05 |
| F_Rremission  | 0.0086825208336154    | 260 | 180     | 1.39825586825922e-05 |
| F_Rremission  | 0.0086825208336154    | 260 | 180     | 1.39825586825922e-05 |
| F_Rremission  | 0.00660594109432379   | 260 | 220     | 1.55121424744287e-05 |
| F_Rremission  | 0.0184208919725374    | 260 | 242     | 1.55622537653329e-05 |
| F_Rremission  | 0.0184208919725374    | 260 | 242     | 1.55622537653329e-05 |
| F_Rremission  | 0.0110169275581025    | 260 | 155     | 1.87654531011438e-05 |
| F_Rremission  | 0.0107721236653888    | 260 | 155     | 2.42515915501361e-05 |
| F_Rremission  | 0.150440145025752     | 260 | 260     | 2.75347330886868e-05 |
| F_Rremission  | 0.00893187151456076   | 260 | 218     | 2.8379997522377e-05  |
| F_Rremission  | 0.0100528335722373    | 260 | 250     | 4.33071653554282e-05 |
| F_Rremission  | 0.0100528335722373    | 260 | 250     | 4.33071653554282e-05 |

|              |                      |     |     |                      |
|--------------|----------------------|-----|-----|----------------------|
| F_Rremission | 0.0229894709858891   | 260 | 253 | 4.66043536643208e-05 |
| F_Rremission | 0.0356894491635197   | 260 | 259 | 4.83782562401373e-05 |
| F_Rremission | 0.0356894491635197   | 260 | 259 | 4.83782562401373e-05 |
| F_Rremission | 0.0356894491635197   | 260 | 259 | 4.83782562401373e-05 |
| F_Rremission | 0.0228289015468383   | 260 | 254 | 5.0740552159259e-05  |
| F_Rremission | 0.00820553584892316  | 260 | 184 | 5.49600038233891e-05 |
| F_Rremission | 0.034583464646137    | 260 | 258 | 0.000170437422331501 |
| F_Rremission | 0.00683060997300483  | 260 | 231 | 0.00020487365602605  |
| F_Rremission | 0.0339175454570775   | 260 | 258 | 0.0002956604957649   |
| F_Rremission | -0.00766414684151014 | 260 | 42  | 0.000299321687530392 |
| F_Rremission | 0.00879023420540545  | 260 | 234 | 0.000305386685678376 |
| F_Rremission | 0.00832858090797622  | 260 | 225 | 0.000343971101666338 |
| F_Rremission | 0.00877083933987701  | 260 | 222 | 0.000379096187289408 |
| F_Rremission | 0.00571518545683837  | 260 | 201 | 0.000380154275495265 |
| F_Rremission | 0.00885973864189734  | 260 | 203 | 0.00039086220583352  |
| F_Rremission | 0.00885973864189734  | 260 | 203 | 0.00039086220583352  |
| F_Rremission | 0.00885973864189734  | 260 | 203 | 0.00039086220583352  |
| F_Rremission | -0.00237378293130738 | 260 | 61  | 0.000518553608318883 |
| F_Rremission | 0.0113965159036884   | 260 | 212 | 0.000600754439013932 |
| F_Rremission | 0.0113965159036884   | 260 | 212 | 0.000600754439013932 |
| F_Rremission | 0.0267443538198879   | 260 | 259 | 0.000620334895205207 |
| F_Rremission | 0.0266587443317334   | 260 | 259 | 0.000626352996964133 |
| F_Rremission | 0.00829010205400153  | 260 | 222 | 0.00072798876688411  |
| F_Rremission | 0.00621245291253428  | 260 | 152 | 0.000749565143970108 |
| F_Rremission | 0.00482234093973922  | 260 | 199 | 0.00090947238785967  |
| F_Rremission | 0.00482234093973922  | 260 | 199 | 0.00090947238785967  |
| F_Rremission | 0.00482234093973922  | 260 | 199 | 0.00090947238785967  |
| F_Rremission | 0.00481999363292008  | 260 | 199 | 0.000921021732665704 |
| F_Rremission | 0.00602942351962874  | 260 | 152 | 0.00106199066918976  |
| F_Rremission | -0.00240242124685183 | 260 | 70  | 0.00106317140245335  |
| F_Rremission | 0.00712943331835652  | 260 | 143 | 0.00112621176614702  |
| F_Rremission | 0.00712943331835652  | 260 | 143 | 0.00112621176614702  |
| F_Rremission | -0.00238621461967317 | 260 | 70  | 0.00117627111914863  |
| F_Rremission | 0.0283686084818666   | 260 | 232 | 0.00132967341006616  |
| F_Rremission | 0.00419704402654728  | 260 | 186 | 0.00156912718986697  |
| F_Rremission | 0.00580465356570866  | 260 | 231 | 0.00159777427446337  |
| F_Rremission | 0.00580465356570866  | 260 | 231 | 0.00159777427446337  |
| F_Rremission | 0.0113307123395818   | 260 | 260 | 0.00187182635400342  |
| F_Rremission | 0.0113307123395818   | 260 | 260 | 0.00187182635400342  |
| F_Rremission | 0.0113307123395818   | 260 | 260 | 0.00187182635400342  |
| F_Rremission | -0.0198785454012118  | 260 | 260 | 0.00205176927555343  |
| F_Rremission | 0.00224944601110198  | 260 | 54  | 0.00209266576158987  |
| F_Rremission | 0.00224944601110198  | 260 | 54  | 0.00209266576158987  |
| IBD_HSIBD    | -0.00842466571246543 | 260 | 63  | 1.89620171758802e-16 |
| IBD_HSIBD    | -0.105657282069405   | 260 | 259 | 3.85142357520605e-16 |
| IBD_HSIBD    | -0.105657282069405   | 260 | 259 | 3.85142357520605e-16 |

|           |                      |     |     |                      |
|-----------|----------------------|-----|-----|----------------------|
| IBD_HSIBD | -0.105657282069405   | 260 | 259 | 3.85142357520605e-16 |
| IBD_HSIBD | -0.00910028823420094 | 260 | 65  | 4.03008882436228e-16 |
| IBD_HSIBD | -0.122175676306574   | 260 | 259 | 3.63803187169564e-13 |
| IBD_HSIBD | -0.0397551698005713  | 260 | 233 | 2.49220842163929e-12 |
| IBD_HSIBD | -0.0397551698005713  | 260 | 233 | 2.49220842163929e-12 |
| IBD_HSIBD | -0.0252684592990025  | 260 | 250 | 1.46406578806169e-11 |
| IBD_HSIBD | -0.0252684592990025  | 260 | 250 | 1.46406578806169e-11 |
| IBD_HSIBD | -0.111846864380486   | 260 | 259 | 7.63936379511196e-11 |
| IBD_HSIBD | -0.0194825465948454  | 260 | 180 | 1.17184293240004e-10 |
| IBD_HSIBD | -0.0194825465948454  | 260 | 180 | 1.17184293240004e-10 |
| IBD_HSIBD | -0.019699494149026   | 260 | 184 | 1.67599779763441e-10 |
| IBD_HSIBD | -0.129018614802871   | 260 | 257 | 1.67765816022091e-10 |
| IBD_HSIBD | -0.126972298115984   | 260 | 257 | 2.40133051939931e-10 |
| IBD_HSIBD | -0.319378838734554   | 260 | 260 | 4.26027193390369e-10 |
| IBD_HSIBD | -0.149864679275397   | 260 | 259 | 4.55149527574688e-10 |
| IBD_HSIBD | -0.149864679275397   | 260 | 259 | 4.55149527574688e-10 |
| IBD_HSIBD | -0.320631913392283   | 260 | 260 | 5.14353977331787e-10 |
| IBD_HSIBD | -0.0339204408843599  | 260 | 260 | 1.18615621026087e-09 |
| IBD_HSIBD | -0.0339204408843599  | 260 | 260 | 1.18615621026087e-09 |
| IBD_HSIBD | -0.0339204408843599  | 260 | 260 | 1.18615621026087e-09 |
| IBD_HSIBD | -0.0222891547349334  | 260 | 234 | 1.24308633178649e-09 |
| IBD_HSIBD | -0.0259733718441898  | 260 | 245 | 1.66477908746617e-09 |
| IBD_HSIBD | -0.0259733718441898  | 260 | 245 | 1.66477908746617e-09 |
| IBD_HSIBD | -0.0115330715183719  | 260 | 186 | 2.01183678776989e-09 |
| IBD_HSIBD | -0.0125895727727741  | 260 | 199 | 2.89606527104224e-09 |
| IBD_HSIBD | -0.0125895727727741  | 260 | 199 | 2.89606527104224e-09 |
| IBD_HSIBD | -0.0125895727727741  | 260 | 199 | 2.89606527104224e-09 |
| IBD_HSIBD | -0.0130875461866174  | 260 | 199 | 3.04405900201149e-09 |
| IBD_HSIBD | -0.00498490388632822 | 260 | 46  | 3.93075959190465e-09 |
| IBD_HSIBD | -0.194521114436633   | 260 | 259 | 4.25326526635348e-09 |
| IBD_HSIBD | -0.0116784567358779  | 260 | 222 | 1.78443278309711e-08 |
| IBD_HSIBD | -0.0178744023884196  | 260 | 218 | 2.31060195725668e-08 |
| IBD_HSIBD | -0.0236622501638504  | 260 | 253 | 2.49851290708144e-08 |
| IBD_HSIBD | -0.0135090913518048  | 260 | 200 | 3.53355461614784e-08 |
| IBD_HSIBD | -0.0474702610555685  | 260 | 229 | 1.06843514025956e-07 |
| IBD_HSIBD | -0.00992982645169203 | 260 | 123 | 1.31231089261016e-07 |
| IBD_HSIBD | -0.00992982645169203 | 260 | 123 | 1.31231089261016e-07 |
| IBD_HSIBD | -0.0123125565423926  | 260 | 200 | 3.69907258763729e-07 |
| IBD_HSIBD | -0.0489061120884719  | 260 | 258 | 1.16594304769072e-06 |
| IBD_HSIBD | -0.00906039096502017 | 260 | 133 | 1.20311385961738e-06 |
| IBD_HSIBD | -0.00906039096502017 | 260 | 133 | 1.20311385961738e-06 |
| IBD_HSIBD | -0.00904042708369952 | 260 | 136 | 1.25308749283145e-06 |
| IBD_HSIBD | -0.0422717390936979  | 260 | 229 | 1.29208130741508e-06 |
| IBD_HSIBD | -0.0422717390936979  | 260 | 229 | 1.29208130741508e-06 |
| IBD_HSIBD | -0.022591636963921   | 260 | 234 | 7.86058757072743e-06 |
| IBD_HSIBD | -0.0111188045436107  | 260 | 229 | 1.6402306922579e-05  |

|                   |                      |     |     |                      |
|-------------------|----------------------|-----|-----|----------------------|
| IBD_HSIBD         | -0.00932588085160324 | 260 | 220 | 3.12451902081243e-05 |
| IBD_HSIBD         | -0.0194312675493053  | 260 | 155 | 4.30174454251918e-05 |
| IBD_HSIBD         | -0.00981539309422297 | 260 | 171 | 4.47367784690171e-05 |
| IBD_HSIBD         | -0.00625163202204601 | 260 | 108 | 0.000131969647582831 |
| IBD_HSIBD         | -0.00625163202204601 | 260 | 108 | 0.000131969647582831 |
| IBD_HSIBD         | -0.017933888452386   | 260 | 212 | 0.000243031315595808 |
| IBD_HSIBD         | -0.017933888452386   | 260 | 212 | 0.000243031315595808 |
| IBD_HSIBD         | 0.0129779945632353   | 260 | 254 | 0.000499771862159514 |
| IBD_HSIBD         | 0.00910434199342279  | 260 | 233 | 0.000663358970799846 |
| IBD_HSIBD         | -0.0160335891816572  | 260 | 249 | 0.000777114243478313 |
| IBD_HSIBD         | 0.00763534829707084  | 260 | 206 | 0.00156015144570876  |
| Ileumyes          | -0.0286783549766237  | 260 | 225 | 2.06006761984234e-05 |
| Ileumyes          | -0.0133206112851762  | 260 | 212 | 2.57479927265557e-05 |
| Ileumyes          | -0.0133206112851762  | 260 | 212 | 2.57479927265557e-05 |
| Ileumyes          | -0.0552463620387837  | 260 | 257 | 2.94443439210748e-05 |
| Ileumyes          | -0.054479133666507   | 260 | 257 | 4.21688029523119e-05 |
| Ileumyes          | -0.0184555450760818  | 260 | 216 | 6.05844927810569e-05 |
| Ileumyes          | -0.00661343862781175 | 260 | 196 | 0.000295034300589521 |
| Ileumyes          | -0.00661343862781175 | 260 | 196 | 0.000295034300589521 |
| Ileumyes          | -0.00661343862781175 | 260 | 196 | 0.000295034300589521 |
| Ileumyes          | -0.00661343862781175 | 260 | 196 | 0.000295034300589521 |
| Ileumyes          | -0.0043730834725772  | 260 | 109 | 0.000337310925803892 |
| Ileumyes          | -0.0043730834725772  | 260 | 109 | 0.000337310925803892 |
| Ileumyes          | -0.0131408922301706  | 260 | 233 | 0.00037320283380451  |
| Ileumyes          | -0.0131408922301706  | 260 | 233 | 0.00037320283380451  |
| Ileumyes          | -0.0100768216026271  | 260 | 260 | 0.000796190403992625 |
| Ileumyes          | -0.0100768216026271  | 260 | 260 | 0.000796190403992625 |
| Ileumyes          | -0.0100768216026271  | 260 | 260 | 0.000796190403992625 |
| Ileumyes          | -0.0100768216026271  | 260 | 260 | 0.000796190403992625 |
| Ileumyes          | -0.0100768216026271  | 260 | 260 | 0.000796190403992625 |
| Ileumyes          | -0.010888450377313   | 260 | 259 | 0.000875486937998124 |
| Ileumyes          | -0.010888450377313   | 260 | 259 | 0.000875486937998124 |
| Ileumyes          | 0.0376603207603003   | 260 | 259 | 0.00157129289222564  |
| Ileumyes          | -0.013186057302148   | 260 | 242 | 0.00166710175659545  |
| Ileumyes          | -0.013186057302148   | 260 | 242 | 0.00166710175659545  |
| Ileumyes          | -0.0301997348658218  | 260 | 257 | 0.00184799164077319  |
| Ileumyes          | -0.0804720561227035  | 260 | 259 | 0.00190310310633624  |
| Ileumyes          | -0.00363966844573751 | 260 | 141 | 0.00263429396897023  |
| Ileumyes          | -0.00363966844573751 | 260 | 141 | 0.00263429396897023  |
| THIOPURINE_MTXyes | 0.00427576477549041  | 260 | 121 | 2.15517652635777e-05 |
| THIOPURINE_MTXyes | 0.00409386500098469  | 260 | 120 | 5.10749343651968e-05 |

Q.value

0.0172412381876456  
0.0194712544783379  
0.0166412263911985  
0.0366616070301651  
0.0366616070301651  
0.0461934747787729  
0.00472934586295554  
0.0239070140708185  
0.0446871730232362  
1.60310108041563e-10  
1.60310108041563e-10  
6.69014180150217e-08  
7.782051451853e-08  
5.56136163666159e-07  
1.82992225015401e-06  
7.01633363559968e-06  
7.31910747175092e-06  
7.31910747175092e-06  
9.09550659727922e-06  
1.12533190412603e-05  
1.49247851256427e-05  
2.22744250627508e-05  
3.73321928929751e-05  
3.73321928929751e-05  
4.98731155443706e-05  
8.31925690829772e-05  
0.000124620852575065  
0.000128038668666754  
0.000243621398601956  
0.000259646534188309  
0.00027751805902526  
0.000353172878177754  
0.000503987957052513  
0.000563466758518075  
0.000594724829299589  
0.000594724829299589  
0.000636456275787333  
0.000636456275787333  
0.000636456275787333  
0.000748272442408108  
0.000932079241505232  
0.00102134649480129  
0.00104059990915382  
0.00148548233853565  
0.00148548233853565

0.00156492513883351  
0.00157476160618406  
0.00157476160618406  
0.00157476160618406  
0.00162929040624978  
0.00173586546729318  
0.00512920167205177  
0.00610791553946823  
0.0082733068551757  
0.00830292333236479  
0.00839813385615535  
0.00922073793542536  
0.00985928568154387  
0.00985928568154387  
0.00989563838578516  
0.00989563838578516  
0.00989563838578516  
0.0129233282073222  
0.0147415896958034  
0.0147415896958034  
0.0151058650053787  
0.0151368640932999  
0.0172021049360023  
0.0174533781698149  
0.0194712544783379  
0.0194712544783379  
0.0194712544783379  
0.0195870621813573  
0.0223126103541197  
0.0223126103541197  
0.0233286722987597  
0.0233286722987597  
0.0240532363466932  
0.027016931070771  
0.0313276520387488  
0.0314623452810996  
0.0314623452810996  
0.0355424170789934  
0.0355424170789934  
0.0355424170789934  
0.038053162726834  
0.0383655389624809  
0.0383655389624809  
2.57119666994313e-13  
2.57119666994313e-13  
2.57119666994313e-13



2.57119666994313e-13  
2.57119666994313e-13  
1.60310108041563e-10  
7.95014486502934e-10  
7.95014486502934e-10  
3.89197488659734e-09  
3.89197488659734e-09  
1.87458234664671e-08  
2.49211930290408e-08  
2.49211930290408e-08  
3.14807619476747e-08  
3.14807619476747e-08  
4.25569130937989e-08  
6.69014180150217e-08  
6.69014180150217e-08  
6.69014180150217e-08  
7.13386603342783e-08  
1.40142159656747e-07  
1.40142159656747e-07  
1.40142159656747e-07  
1.41623049942818e-07  
1.77021509633903e-07  
1.77021509633903e-07  
2.07024495257612e-07  
2.71719065136022e-07  
2.71719065136022e-07  
2.71719065136022e-07  
2.77444234754762e-07  
3.48308974949329e-07  
3.66700437828854e-07  
1.45957450719995e-06  
1.82992225015401e-06  
1.89768004133091e-06  
2.62140447104921e-06  
7.31910747175092e-06  
8.54341172944165e-06  
8.54341172944165e-06  
2.2264229348232e-05  
6.39655535363243e-05  
6.39655535363243e-05  
6.39655535363243e-05  
6.54244344548271e-05  
6.54244344548271e-05  
6.54244344548271e-05  
0.000353172878177754  
0.000662321001050975

0.00111991187375187  
0.00148548233853565  
0.00151819492889537  
0.00404791515181951  
0.00404791515181951  
0.0071125678600975  
0.0071125678600975  
0.0125533247266839  
0.0159106399763271  
0.0177611705506047  
0.0313276520387488  
0.000811310581147787  
0.000966307021149563  
0.000966307021149563  
0.00106735746713896  
0.00148548233853565  
0.00189475031344678  
0.0082733068551757  
0.0082733068551757  
0.0082733068551757  
0.0082733068551757  
0.00911882926537641  
0.00911882926537641  
0.00983898380030072  
0.00983898380030072  
0.0177611705506047  
0.0177611705506047  
0.0177611705506047  
0.0177611705506047  
0.0177611705506047  
0.0192607126359587  
0.0192607126359587  
0.0313276520387488  
0.0324271622167041  
0.0324271622167041  
0.0355424170789934  
0.0359224787527373  
0.0472100997809834  
0.0472100997809834  
0.000838416234034304  
0.00162929040624978

Variable

- 1 F\_R
- 2 F\_R
- 3 F\_R
- 4 F\_R
- 5 F\_R
- 6 F\_R
- 7 F\_R
- 8 F\_R
- 9 F\_R
- 10 F\_R
- 11 F\_R
- 12 F\_R
- 13 IBD\_HS
- 14 IBD\_HS
- 15 IBD\_HS
- 16 IBD\_HS
- 17 IBD\_HS
- 18 IBD\_HS
- 19 IBD\_HS

Feature

k\_\_Fungi|p\_\_Ascomycota

k\_\_Fungi|p\_\_Basidiomycota

k\_\_Fungi|p\_\_Basidiomycota|c\_\_Incertaedis|o\_\_Malasseziales|f\_\_Incertaedis|g\_\_Malassezia|

k\_\_Fungi|p\_\_Ascomycota|c\_\_Saccharomycetes|o\_\_Saccharomycetales|f\_\_Saccharomycetaceae

k\_\_Fungi|p\_\_Ascomycota|c\_\_Saccharomycetes|o\_\_Saccharomycetales|f\_\_Saccharomycetaceae|g

k\_\_Fungi|p\_\_Ascomycota|c\_\_Saccharomycetes|o\_\_Saccharomycetales|f\_\_Saccharomycetaceae|g

k\_\_Fungi|p\_\_Basidiomycota|Other

k\_\_Fungi|p\_\_Basidiomycota|Other|Other

k\_\_Fungi|p\_\_Basidiomycota|Other|Other|Other

k\_\_Fungi|p\_\_Basidiomycota|Other|Other|Other|Other

k\_\_Fungi|p\_\_Ascomycota|c\_\_Saccharomycetes|o\_\_Saccharomycetales

k\_\_Fungi|p\_\_Ascomycota|c\_\_Saccharomycetes

k\_\_Fungi|p\_\_Ascomycota

k\_\_Fungi|p\_\_Basidiomycota

k\_\_Fungi|p\_\_Ascomycota|c\_\_Saccharomycetes|o\_\_Saccharomycetales

k\_\_Fungi|p\_\_Ascomycota|c\_\_Saccharomycetes

k\_\_Fungi|p\_\_Ascomycota|c\_\_Saccharomycetes|o\_\_Saccharomycetales|f\_\_Saccharomycetaceae

k\_\_Fungi|p\_\_Ascomycota|c\_\_Saccharomycetes|o\_\_Saccharomycetales|f\_\_Saccharomycetaceae|g

k\_\_Fungi|p\_\_Ascomycota|c\_\_Saccharomycetes|o\_\_Saccharomycetales|f\_\_Saccharomycetaceae|g

| Value        | Coefficient         | N   | N.not.0 | P.value              |
|--------------|---------------------|-----|---------|----------------------|
| F_Rremission | 0.161015981772809   | 259 | 259     | 1.22323327385739e-06 |
| F_Rremission | -0.157801103147122  | 259 | 230     | 1.49376860316499e-05 |
| F_Rremission | 0.034159689629057   | 259 | 88      | 0.000189630487589262 |
| F_Rremission | 0.176942074123673   | 259 | 229     | 0.000288275517799094 |
| F_Rremission | 0.174691133923712   | 259 | 229     | 0.00030509985140341  |
| F_Rremission | 0.174691133923712   | 259 | 229     | 0.00030509985140341  |
| F_Rremission | -0.0103548925729985 | 259 | 63      | 0.000747695359971366 |
| F_Rremission | -0.0103548925729985 | 259 | 63      | 0.000747695359971366 |
| F_Rremission | -0.0103548925729985 | 259 | 63      | 0.000747695359971366 |
| F_Rremission | -0.0103548925729985 | 259 | 63      | 0.000747695359971366 |
| F_Rremission | 0.125335372324228   | 259 | 259     | 0.000861312783128581 |
| F_Rremission | 0.124443892219203   | 259 | 259     | 0.000973772070770371 |
| IBD_HSIBD    | -0.241999980240929  | 259 | 259     | 4.18893527499225e-07 |
| IBD_HSIBD    | 0.260402329379016   | 259 | 230     | 7.80527621143302e-07 |
| IBD_HSIBD    | -0.207798158022306  | 259 | 259     | 0.000129095561360952 |
| IBD_HSIBD    | -0.214486699722227  | 259 | 259     | 0.000162630464221362 |
| IBD_HSIBD    | -0.255059916729299  | 259 | 229     | 0.000509649835251042 |
| IBD_HSIBD    | -0.22844734654855   | 259 | 229     | 0.0010848949865301   |
| IBD_HSIBD    | -0.22844734654855   | 259 | 229     | 0.0010848949865301   |

Q.value

0.000327418772969161

0.00299874047085372

0.0217533259334539

0.0244995180676938

0.0244995180676938

0.0244995180676938

0.0400266249371338

0.0400266249371338

0.0400266249371338

0.0400266249371338

0.0432271353032656

0.0458510881149298

0.000313381839889036

0.000313381839889036

0.0207327471545689

0.0217533259334539

0.0372044379733261

0.0458510881149298

0.0458510881149298
